# Supplementary material
Source: publisher site journal article supplement (https://www.dovepress.com/article/542082)
Supplement: Supplementary file 1 [file Supplemental%20Figure%201_eye%20brain_1.docx]

**Supplemental Figure 1. Principal Component Analysis Loading Patterns**

Heatmap showing loading values for each retinal measurement onto the three principal components that together explain >95% of total variance. Loading values shown for ETDRS sectors and volume measurements. Color intensity indicates loading magnitude and direction linking PC space to retinal measurements.
